# Supplementary material
Source: publisher figshare collection journal article supplement (https://karger.figshare.com/ndownloader/files/31070404)
Supplement: Supplementary file 1 [file 31070404]

Supplementary Fig. 1. Kaplan-Meier curves of the cumulative risk of stroke stratified by relative change levels of SUA.

(A): Relative changes of serum uric acid and stroke risk in the total population. (B): Relative changes of serum uric acid and stroke risk in the baseline serum uric acid normal population. (C): Relative changes of serum uric acid and stroke risk in the baseline hyperuricemia population.

Supplementary Fig. 2. Schoenfeld residual plot of proportional hazards hypothesis test.
